# Supplementary material for: Decision-making scheme for disinfection by-product monitoring intended for small drinking water systems
Source: Royal Society of Chemistry journal article supplement (doi:10.1039/c6ew00327c), 2017-01-01
Supplement: c6ew00327c1.pdf [file c6ew00327c1.pdf]

**Supplementary Table 1: Information on water quality of all SWS under study**

| Type of water                                    | Parameters                             | Newfoundland and Labrador |                          | Quebec  |                          |
|--------------------------------------------------|----------------------------------------|---------------------------|--------------------------|---------|--------------------------|
|                                                  |                                        | Mean*                     | Coefficient of variation | Mean*   | Coefficient of variation |
| Raw water (RW)                                   | pH (5%-95% percent.)                   | 5.7-8.5                   | 14 %                     | 5.9-7.9 | 9 %                      |
|                                                  | Turbidity (NTU)                        | 0.78                      | 115 %                    | 1.96    | 154 %                    |
|                                                  | Conductivity ( $\mu\text{S cm}^{-1}$ ) | 59                        | 60 %                     | 61      | 80 %                     |
|                                                  | UV-254 ( $\text{cm}^{-1}$ )            | 0.26                      | 50 %                     | 0.25    | 86 %                     |
|                                                  | DOC ( $\text{mg/L}$ )                  | 7.27                      | 41 %                     | 5.78    | 59 %                     |
|                                                  | SUVA ( $\text{L mg}^{-1} \text{m}$ )   | 3.60                      | 31 %                     | 3.98    | 110 %                    |
|                                                  | Bromide ( $\mu\text{g L}^{-1}$ )       | 12.4                      | 79 %                     | 3.8     | 82 %                     |
| Water before disinfection                        | pH                                     | <i>idem</i> **            | <i>idem</i> **           | 5.1-7.7 | 12 %                     |
|                                                  | Turbidity (NTU)                        | <i>idem</i> **            | <i>idem</i> **           | 0.34    | 97 %                     |
|                                                  | Conductivity ( $\mu\text{S cm}^{-1}$ ) | <i>idem</i> **            | <i>idem</i> **           | 83      | 61 %                     |
|                                                  | UV-254 ( $\text{cm}^{-1}$ )            | <i>idem</i> **            | <i>idem</i> **           | 0.05    | 88 %                     |
|                                                  | DOC ( $\text{mg L}^{-1}$ )             | <i>idem</i> **            | <i>idem</i> **           | 2.44    | 53 %                     |
|                                                  | SUVA ( $\text{L mg}^{-1} \text{m}$ )   | <i>idem</i> **            | <i>idem</i> **           | 1.93    | 54 %                     |
| Water from the middle of the distribution system | Turbidity (NTU)                        | 0.57                      | 61 %                     | 0.46    | 179 %                    |
|                                                  | Conductivity ( $\mu\text{S cm}^{-1}$ ) | 69                        | 46 %                     | 89      | 57 %                     |
|                                                  | UV-254 ( $\text{cm}^{-1}$ )            | 0.21                      | 48 %                     | 0.05    | 83 %                     |
|                                                  | DOC ( $\text{mg L}^{-1}$ )             | 6.87                      | 38 %                     | 2.51    | 55 %                     |
|                                                  | SUVA ( $\text{L mg}^{-1} \text{m}$ )   | 3.19                      | 35 %                     | 1.91    | 50 %                     |

\*: Number of observations per parameter and per season = 75

\*\* : Systems in NL do not present any treatment before disinfection

UV-254: UV absorbance at 254nm

SUVA: Specific UV absorbance (SUVA= (UVA-254 / DOC) \* 100)

**Supplementary Table 2: Summer average levels of a) THMs, b) HAAs, c) HANs, d) CPK and e) HKs based on different scenarios (levels in µg/L)**

a)

| SWS  | Summer 2012 regulatory level of THMs (Scenario 1) | One value chosen randomly from daily campaigns in July and August 2012 (Scenario 2) | Daily average level of THMs based on a twenty-day average during one month in July and August 2012 (Scenario 6) |
|------|---------------------------------------------------|-------------------------------------------------------------------------------------|-----------------------------------------------------------------------------------------------------------------|
| NL3  | 80.9                                              | <b>82.8</b>                                                                         | <b>63.9</b>                                                                                                     |
| NL5  | 130                                               | 118                                                                                 | 123                                                                                                             |
| NL10 | 308                                               | <b>229</b>                                                                          | <b>212</b>                                                                                                      |
| QC8  | 86.1                                              | 94.4                                                                                | 81.4                                                                                                            |
| QC11 | 77.1                                              | 79.6                                                                                | 77.4                                                                                                            |
| QC13 | 88.3                                              | 117                                                                                 | 104                                                                                                             |

b)

| SWS  | One value taken randomly from daily campaigns in July and August 2012 (Scenario 2) | Daily average level of HAAs based on a twenty-day average during one month in July and August 2012 (Scenario 6) |
|------|------------------------------------------------------------------------------------|-----------------------------------------------------------------------------------------------------------------|
| NL3  | <b>82.3</b>                                                                        | <b>85.4</b>                                                                                                     |
| NL5  | 188                                                                                | 179                                                                                                             |
| NL10 | <b>218</b>                                                                         | <b>271</b>                                                                                                      |
| QC8  | 37.7                                                                               | 33.2                                                                                                            |
| QC11 | 29.6                                                                               | 30.6                                                                                                            |
| QC13 | 113                                                                                | 118                                                                                                             |

c)

| SWS  | One value taken randomly from daily campaigns in July and August 2012 (Scenario 2) | Daily average level of HANs based on a twenty-day average during one month in July and August 2012 (Scenario 6) |
|------|------------------------------------------------------------------------------------|-----------------------------------------------------------------------------------------------------------------|
| NL3  | <b>2.95</b>                                                                        | <b>2.85</b>                                                                                                     |
| NL5  | 4.08                                                                               | 4.28                                                                                                            |
| NL10 | <b>7.14</b>                                                                        | <b>8.07</b>                                                                                                     |
| QC8  | 3.66                                                                               | 3.22                                                                                                            |
| QC11 | 3.20                                                                               | 3.46                                                                                                            |
| QC13 | 2.92                                                                               | 3.30                                                                                                            |

d)

| SWS  | One value taken randomly from daily campaigns in July and August 2012 (Scenario 2) | Daily average level of CPK based on a twenty-day average during one month in July and August 2012 (Scenario 6) |
|------|------------------------------------------------------------------------------------|----------------------------------------------------------------------------------------------------------------|
| NL3  | <b>0.79</b>                                                                        | <b>0.85</b>                                                                                                    |
| NL5  | 0.43                                                                               | 0.50                                                                                                           |
| NL10 | <b>0.87</b>                                                                        | <b>0.97</b>                                                                                                    |
| QC8  | 1.52                                                                               | 1.28                                                                                                           |
| QC11 | 0.75                                                                               | 0.31                                                                                                           |
| QC13 | 0.53                                                                               | 0.58                                                                                                           |

e)

| SWS  | One value taken randomly from daily campaigns in July and August 2012 (Scenario 2) | Daily average level of HKs based on a twenty-day average during one month in July and August 2012 (Scenario 6) |
|------|------------------------------------------------------------------------------------|----------------------------------------------------------------------------------------------------------------|
| NL3  | <b>8.96</b>                                                                        | <b>8.35</b>                                                                                                    |
| NL5  | 19.3                                                                               | 16.3                                                                                                           |
| NL10 | <b>12.5</b>                                                                        | <b>14.0</b>                                                                                                    |
| QC8  | 5.24                                                                               | 3.15                                                                                                           |
| QC11 | 4.46                                                                               | 5.25                                                                                                           |
| QC13 | 9.60                                                                               | 9.91                                                                                                           |

Note 1: Numbers in bold represent values presenting difference (ratio: (Regulatory level - Calculated level)/Regulatory level\*100) with annual regulatory average upper than 20%.

Note 2: Grey boxes represent values higher than MAC for THMs and HAAs (respectively 100 and 80 µg/L in NL and 80 and 60 µg/L in QC).
